# Supplementary material for: ZIF-67-derived Co–N–C supported nickel cobalt sulfide as a bifunctional electrocatalyst for sustainable hydrogen production via alkaline electrolysis
Source: Royal Society of Chemistry journal article supplement (doi:10.1039/d4nr01196a), 2024-01-01
Supplement: d4nr01196a1.pdf [file d4nr01196a1.pdf]

## Electronic Supplementary Information

### ZIF-67-Derived Co-N-C Supported Nickel Cobalt Sulfide as a Bifunctional Electrocatalyst for Sustainable Hydrogen Production via Alkaline Electrolysis

Sumit,<sup>a</sup> Apurba Borah,<sup>a</sup> Sathishkumar Palaniyappan,<sup>b</sup> Gaddam Rajeshkhanna<sup>\*a</sup>

<sup>a</sup>Department of Chemistry, National Institute of Technology Warangal, Hanumakonda-506004, Telangana, India.

<sup>b</sup>Department of Physics, Centre for Functional Materials, School of Advanced Sciences, Vellore Institute of Technology, Vellore-632014, India.

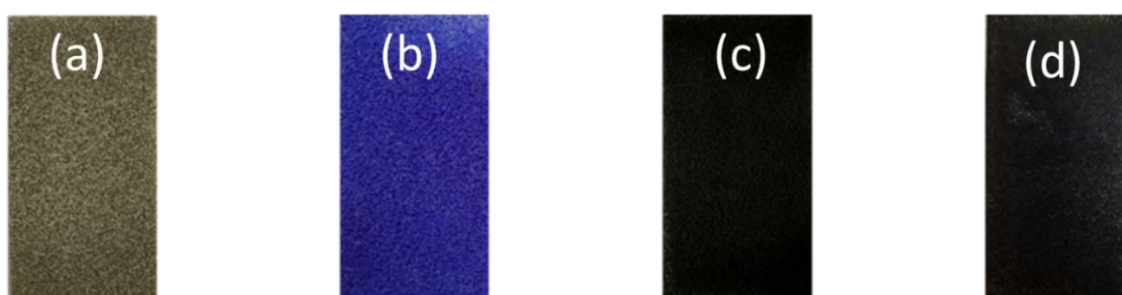

**Fig. S1** Digital images of (a) bare NF, (b) NF@ZIF-67, (c) NF@ZIF-67@NiCo<sub>2</sub>S<sub>4</sub>, (d) NF@Co-N-C@NiCo<sub>2</sub>S<sub>4</sub>.

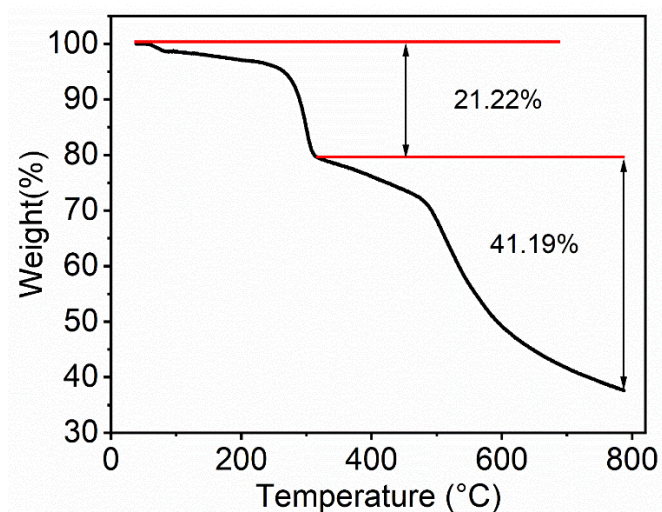

**Fig. S2** TGA analysis of ZIF-67.

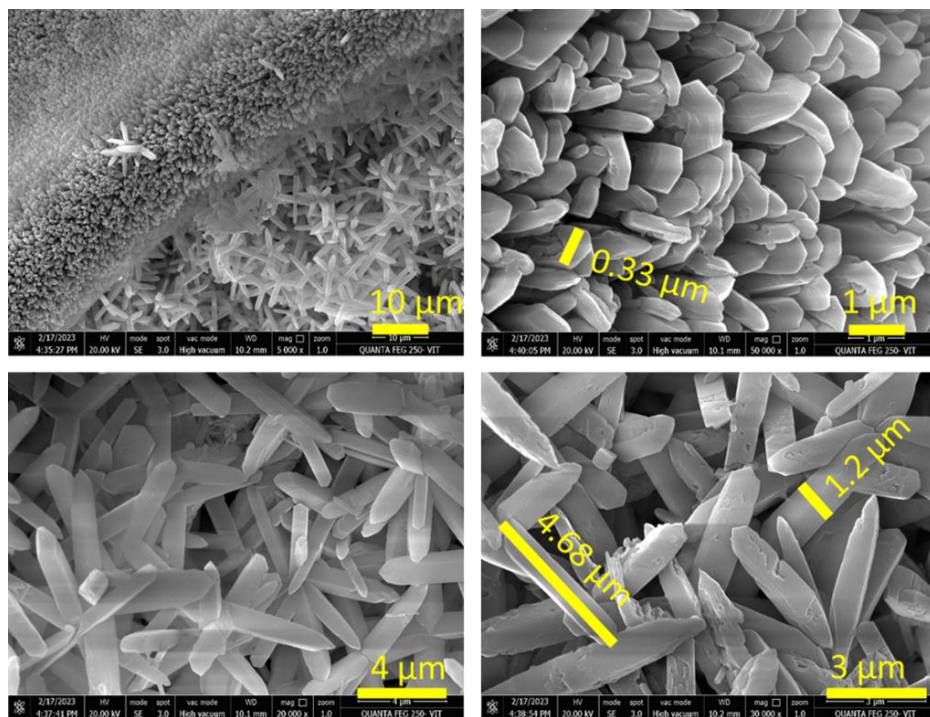

**Fig. S3** FESEM images of NF@ZIF-67.

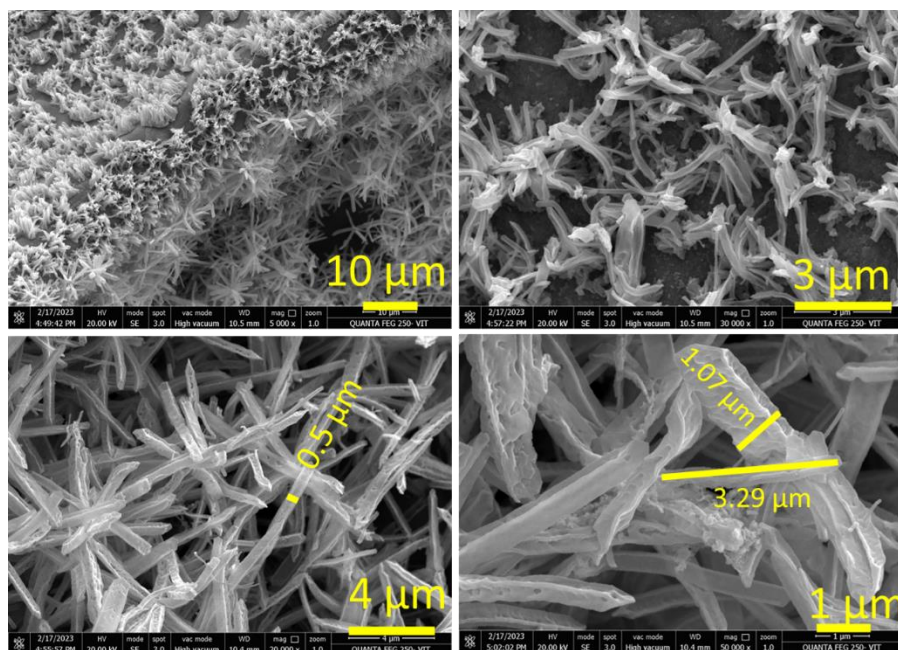

**Fig. S4** FESEM images of ZIF-67 after calcination (Co-N-C).

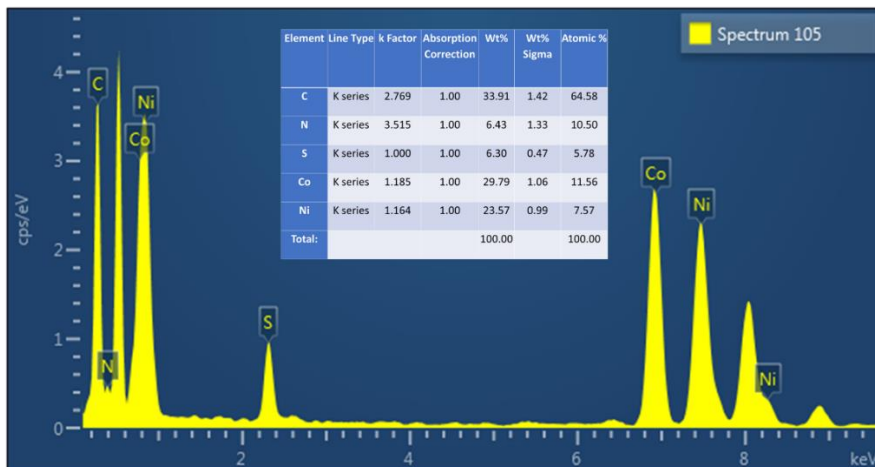

Fig. S5 EDS spectrum of NF@Co-N-C@NiCo<sub>2</sub>S<sub>4</sub>.

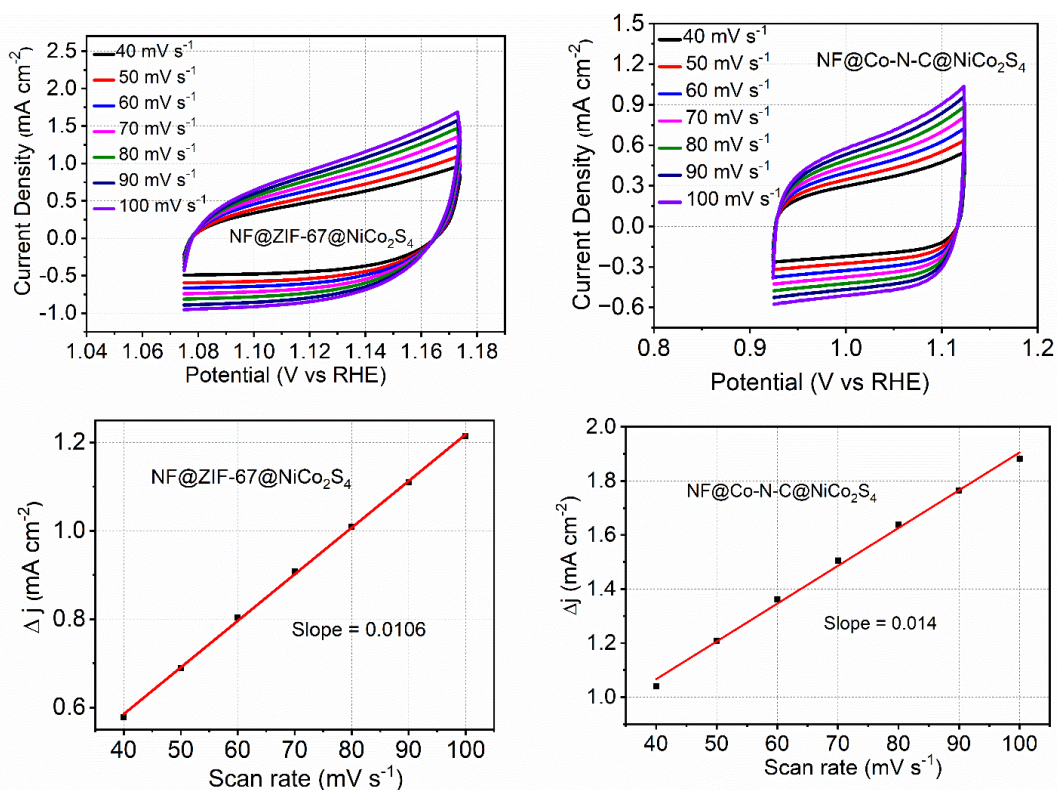

Fig. S6 (a and b) cyclic voltammograms at different scan rates ranging from 40 to 100 mV s<sup>-1</sup>  
 (c and d) Scan rate dependent current densities of the materials.



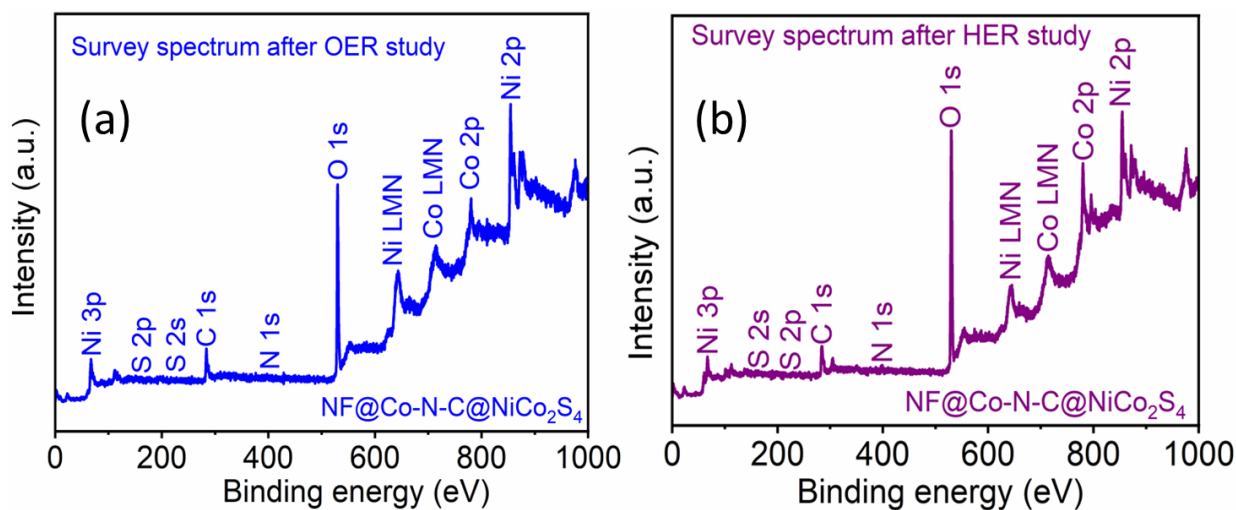

Fig. S7 XPS survey spectrum of NF@Co-N-C@NiCo<sub>2</sub>S<sub>4</sub> after (a) OER and (b) HER studies.

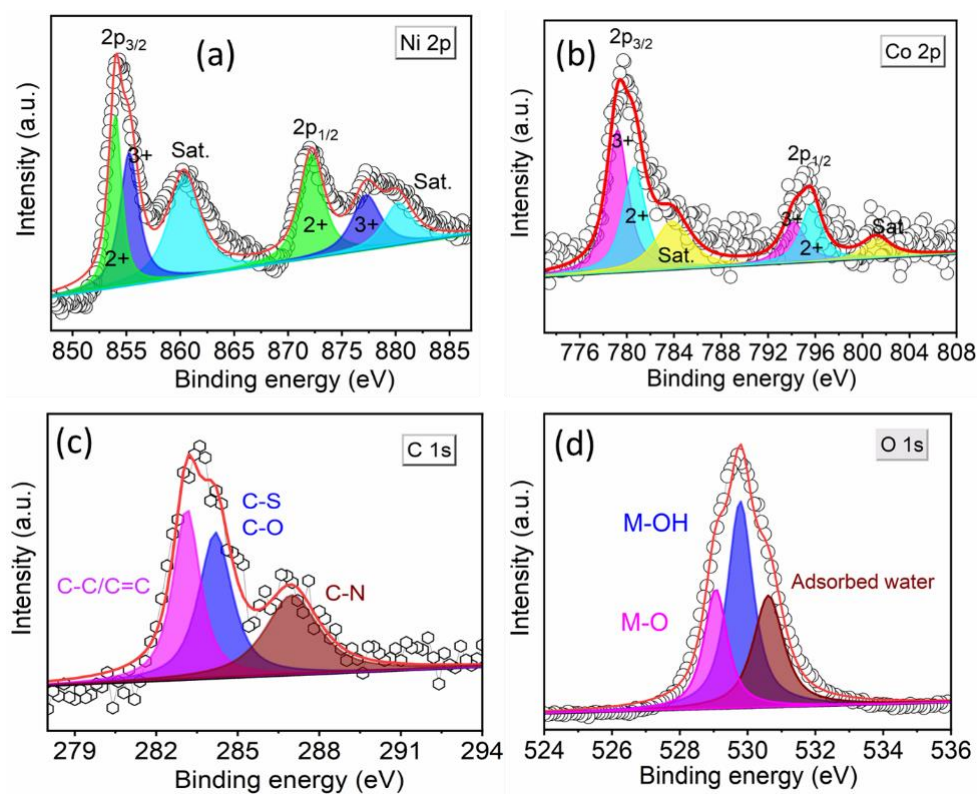

Fig. S8 XPS high-resolution spectra of NF@Co-N-C@NiCo<sub>2</sub>S<sub>4</sub> for (a) Ni 2p, (b) Co 2p, (c) C 1s, (d) O 1s after OER study.

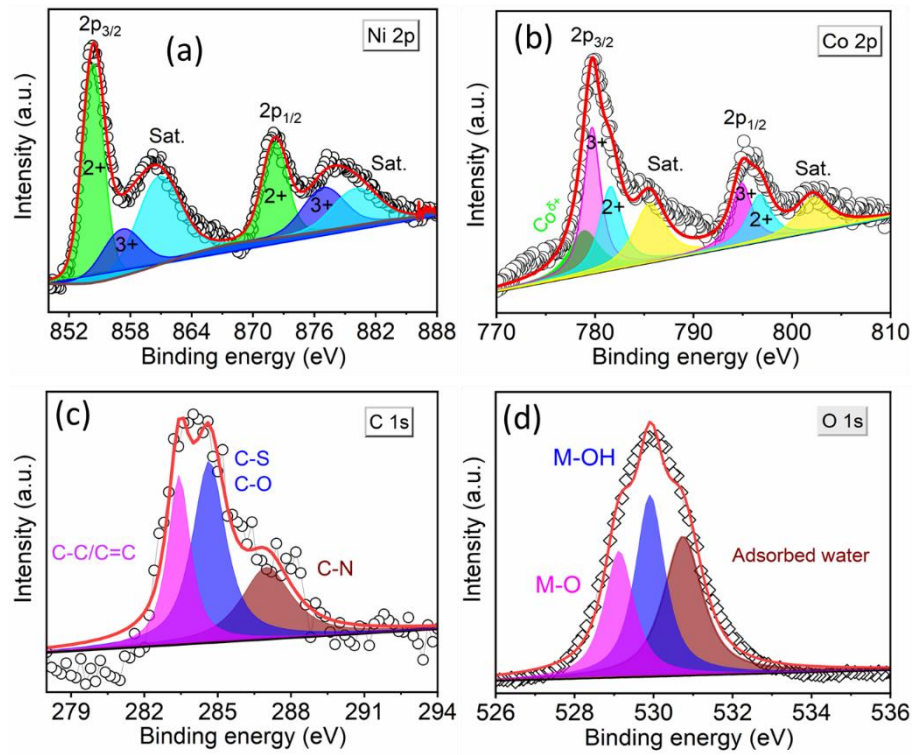

**Fig. S9** XPS high-resolution spectra of NF@Co-N-C@NiCo<sub>2</sub>S<sub>4</sub> for (a) Ni 2p, (b) Co 2p, (c) C 1s, (d) O 1s after HER study.

**Table S1** Comparison of OER performance of NF@ZIF-67@NiCo<sub>2</sub>S<sub>4</sub> and NF@Co-N-C@NiCo<sub>2</sub>S<sub>4</sub> with other electrocatalysts in 1.0 M KOH.

| Catalysts                                                                              | j<br>(mA cm <sup>-2</sup> ) | η<br>(mV vs<br>RHE) | Tafel slope<br>(mV dec <sup>-1</sup> ) | Electrolyte                          | References |
|----------------------------------------------------------------------------------------|-----------------------------|---------------------|----------------------------------------|--------------------------------------|------------|
| CoNi@C on NF                                                                           | 100                         | 355                 | 55.6                                   | 1 M KOH                              | S1         |
| Fe <sub>3</sub> C-Co-NC on NF                                                          | 50                          | 338                 | 59                                     | 1 M KOH                              | S2         |
| NiCoDH/NiCoS                                                                           | 20                          | 303                 | 77.6                                   | 1 M KOH                              | S3         |
| V <sub>s</sub> -NiCo <sub>2</sub> S <sub>4</sub> /N,S-rGO                              | 10                          | 340                 | 43.8                                   | 0.1 M KOH                            | S4         |
| Ni <sub>3</sub> S <sub>2</sub> /VG@NiCo LDHs                                           | 100                         | 320                 | 67                                     | 1 M KOH                              | S5         |
| CoS <sub>x</sub> /Ni <sub>3</sub> S <sub>2</sub> @NF                                   | 10                          | 1.572               | 105.4                                  | 1 M KOH                              | S6         |
|                                                                                        | 50                          | 1.863               |                                        |                                      |            |
| Co <sub>3</sub> S <sub>4</sub> @rGO                                                    | 10                          | 151                 | 59                                     | 0.5 M H <sub>2</sub> SO <sub>4</sub> | S7         |
| NiCoS-3                                                                                | 10                          | 320                 | 58.8                                   | 1.0 M KOH                            | S8         |
| NiCo <sub>2</sub> S <sub>4</sub> NW/NF                                                 | 10                          | 260                 | 40.1                                   | 1.0 M KOH                            | S9         |
| Ni <sub>0.7</sub> Fe <sub>0.3</sub> S <sub>2</sub>                                     | 10                          | 198                 | 56                                     | 1.0 M KOH                            | S10        |
| Ni <sub>3</sub> S <sub>2</sub> /NF                                                     | 10                          | 260                 | -                                      | 1.0 M KOH                            | S11        |
| NiFeS-2                                                                                | 10                          | 286                 | 56.3                                   | 1.0 M KOH                            | S12        |
| FeOOH decorated on Ni                                                                  | 20                          | 267                 | 79                                     | 1.0 M KOH                            | S13        |
| MOF                                                                                    |                             |                     |                                        |                                      |            |
| NDA/MWCNTs-a                                                                           | 10                          | 285                 | 73                                     | 1.0 M KOH                            | S14        |
| NiFe-Se/CFP                                                                            | 10                          | 281 mV              | 40.93                                  | 1.0 M KOH                            | S15        |
| Ni-Fe-Se/N-CNTs                                                                        | 10                          | 215                 | 97.1                                   | 1.0 M KOH                            | S16        |
| powder                                                                                 |                             |                     |                                        |                                      |            |
| NiFeSe@NiSe O@CC                                                                       | 10                          | 270                 | 63.2                                   | 1.0 M KOH                            | S17        |
| NiFe-based selenide                                                                    | 10                          | 216                 | 36                                     | 1.0 M KOH                            | S18        |
| powder                                                                                 |                             |                     |                                        |                                      |            |
| NiSe <sub>2</sub> NPs/                                                                 | 10                          | 324                 | 47.47                                  | 1.0 M KOH                            | S19        |
| (Co.Ni)Se <sub>2</sub> @NiFe LDH                                                       | 10                          | 277                 | 75                                     | 1.0 M KOH                            | S20        |
| Ni-Co-S-P                                                                              | 10                          | 280                 | 78                                     | 1.0 M KOH                            | S21        |
| (Co <sub>1-x</sub> Ni <sub>x</sub> )(S <sub>1-y</sub> P <sub>y</sub> ) <sub>2</sub> /G | 10                          | 285                 | 105                                    | 1.0 M KOH                            | S22        |

|                                            |     |     |      |           |           |
|--------------------------------------------|-----|-----|------|-----------|-----------|
| FeCoNiP <sub>0.5</sub> S <sub>0.5</sub>    | 100 | 285 | 69   | 1.0 M KOH | S23       |
| Ru@NiCo-MOF HPNs                           | 10  | 284 | 78.8 | 1.0 M KOH | S24       |
| NF@ZIF-67@NiCo <sub>2</sub> S <sub>4</sub> | 50  | 248 | 68   | 1.0 M KOH |           |
|                                            | 100 | 361 | 68   | 1.0 M KOH | This work |
| NF@Co-N-C@NiCo <sub>2</sub> S <sub>4</sub> | 50  | 239 | 66   | 1.0 M KOH |           |
|                                            | 100 | 300 | 66   | 1.0 M KOH | This work |

**Table S2** Comparison of HER performance of NF@ZIF-67@NiCo<sub>2</sub>S<sub>4</sub> and NF@Co-N-C@NiCo<sub>2</sub>S<sub>4</sub> with other electrocatalysts in 1.0 M KOH.

| Catalysts                                  | j<br>(mA cm <sup>-2</sup> ) | $\eta$<br>(mV vs RHE) | Tafel slope<br>(mV dec <sup>-1</sup> ) | Electrolyte | Reference |
|--------------------------------------------|-----------------------------|-----------------------|----------------------------------------|-------------|-----------|
| Ni-MOF/NC-800                              | 10                          | 369                   | 127.1                                  | 1.0 M KOH   | S25       |
| Fe-Co-CN/rGO-700                           | 10                          | 215                   | -                                      | 1.0 M KOH   | S26       |
| NiCo <sub>2</sub> S <sub>4</sub> NW/NF     | 10                          | 260                   | 67                                     | 1.0 M KOH   | S9        |
| Ni <sub>3</sub> S <sub>2</sub> -CNFs/CC    | 20                          | 300                   | -                                      | 1.0 M KOH   | S30       |
| NF@ZIF-67@NiCo <sub>2</sub> S <sub>4</sub> | 20                          | 230                   | 139                                    | 1.0 M KOH   | This work |
| NF@Co-N-C@NiCo <sub>2</sub> S <sub>4</sub> | 20                          | 229                   | 131                                    | 1.0 M KOH   | This work |

**Table S3** Comparison of Overall water splitting performance of NF@ZIF-67@NiCo<sub>2</sub>S<sub>4</sub> and NF@Co-N-C@NiCo<sub>2</sub>S<sub>4</sub> with other electrocatalysts in 1.0 M KOH.

| Catalysts                                          | j<br>(mA cm <sup>-2</sup> ) | $\eta$<br>(mV vs RHE) | Reference |
|----------------------------------------------------|-----------------------------|-----------------------|-----------|
| Co-NCNTFs//NF                                      | 10                          | 1.62                  | S27       |
| FeCoNi@FeNC                                        | 10                          | 1.63                  | S28       |
| Co(S <sub>x</sub> Se <sub>1-x</sub> ) <sub>2</sub> | 10                          | 1.63                  | S36       |
| NiS/Ni <sub>2</sub> P/CC                           | 10                          | 1.67                  | S37       |

|                                                                                                    |    |       |           |
|----------------------------------------------------------------------------------------------------|----|-------|-----------|
| Ni-Co-S-P                                                                                          | 10 | 1.61  | S21       |
| (Co <sub>1-x</sub> Ni <sub>x</sub> )(S <sub>1-y</sub> P <sub>y</sub> ) <sub>2</sub> /G             | 10 | 285   | S38       |
| Ni <sub>0.33</sub> Co <sub>0.67</sub> S <sub>2</sub>                                               | 5  | 1.65  | S29       |
| NiCo <sub>2</sub> S <sub>4</sub> NW/NF                                                             | 10 | 1.63  | S9        |
| NiCo(OH) <sub>2</sub> /NF                                                                          | 10 | 1.65  | S29       |
| N, O and S tridoped<br>carbon-encapsulated                                                         | 10 | 1.6   | S31       |
| Ni <sub>3</sub> S <sub>4</sub> /NF                                                                 | 10 | 1.61  | S32       |
| Ni <sub>0.7</sub> Fe <sub>0.3</sub> S <sub>2</sub>                                                 | 10 | 1.625 | S33       |
| Ni Co-LDH/NF                                                                                       | 10 | 1.66  | S34       |
| NiCo <sub>2</sub> S <sub>4</sub> /N-rGO                                                            | 10 | 1.63  | S35       |
| Ni <sub>3</sub> S <sub>2</sub> /VG@NiCo LDHs                                                       | 10 | 1.66  | S5        |
| NF@ZIF67@NiCo <sub>2</sub> S <sub>4</sub>   NF@ZIF-<br>67@NiCo <sub>2</sub> S <sub>4</sub>         | 10 | 1.62  | This work |
| NF@Co-N-C@NiCo <sub>2</sub> S <sub>4</sub> (+)  NF@Co-N-<br>C@NiCo <sub>2</sub> S <sub>4</sub> (-) | 10 | 1.59  | This work |

## References

- S1 X. Zhang, J. Luo, K. Wan, D. Plessers, B. Sels, J. Song, L. Chen, T. Zhang, P. Tang, J. R. Morante, J. Arbiol and J. Fransaer, *J. Mater. Chem. A*, 2019, **7**, 1616-1628.
- S2 H. Wang, C. Sun, E. Zhu, C. Shi, J. Yu and M. Xu, *J. Alloys Compd.*, 2023, **948**, 169728.
- S3 H. Zhao, Y. Yang, X. Dai, H. Qiao, J. Yong, X. Luan, L. Yu, C. Luan, Y. Wang and X. Zhang, *Electrochim. Acta*, 2019, **295**, 1085-1092.
- S4 X. Feng, Q. Jiao, Q. Li, Q. Shi, Z. Dai, Y. Zhao, H. Li, C. Feng, W. Zhou and T. Feng, *Electrochim. Acta*, 2020, **331**, 135356.
- S5 X. Zhang, J. Fan, X. Lu, Z. Han, C. Cazorla, L. Hu, T. Wu, D. Chu, *Chem. Eng. J.*, 2021, **415**, 129048.



- S6 S. Shit, S. Chhetri, W. Jang, N. C. Murmu, H. Koo, P. Samanta and T. Kuila, *ACS Appl. Mater. Interfaces*, 2018, **10**, 27712-27722.
- S7 R. S. Kumar, S. C. Karthikeyan, S. Ramakrishnan, S. Vijayapradeep, A. Rhan Kim, J.-S. Kim and D. J. Yoo, *Chem. Eng. J.*, 2023, **451**, 138471.
- S8 Z. Yu, Y. Bai, S. Zhang, Y. Liu, N. Zhang and K. Sun, *Int. J. Hydrogen Energy*, 2018, **43**, 8815-8823.
- S9 A. Sivanantham, P. Ganesan and S. Shanmugam, *Adv. Funct. Mater.*, 2016, **26**, 4661-4672.
- S10 J. Yu, G. Cheng and W. Luo, *J. Mater. Chem. A*, 2017, **5**, 15838-15844.
- S11 L. Feng, G. Yu, Y. Wu, G. Li, H. Li, Y. Sun, T. Asefa, W. Chen and X. Zou, *J. Am. Chem. Soc.*, 2015, **137**, 14023-14026.
- S12 B. Q. Li, S. Y. Zhang, C. Tang, X. Cui and Q. Zhang, *Small*, 2017, **13**, 1700610.
- S13 J. Yao, Y. Ji, L. Pei, S. Tan, F. Ren, *New J. Chem.*, 2022, **46**, 9650.
- S14 S. Kiran, G. Yasmeen, Z. Shafiq, A. Abbas, S. Manzoor, D. Hussain, R. A. Pashameah, E. Alzahrani, A. K. Alanazi and M. N. Ashiq, *Fuel*, 2023, **331**, 125881.
- S15 Y. Guo, C. Zhang, J. Zhang, K. Dastafkan, K. Wang, C. Zhao and Z. Shi, *ACS Sustainable Chem. Eng.*, 2021, **9**, 2047-2056.
- S16 Y. Feng, S. Wang, H. Wang, Y. Zhong, Y. Hu, *J. Mater. Sci.*, 2020, **55**, 13927-13937.
- S17 G. Yilmaz, C. F. Tan, Y.-F. Lim and G. W. Ho, *Adv. Energy Mater.*, 2019, **9**, 1802983.
- S18 C. Xuan, K. Xia, W. Lei, W. Xia, W. Xiao, L. Chen, H. L. Xin and D. Wang, *Electrochim. Acta*, 2018, **291**, 64-72.
- S19 Y. Guo, C. Zhang, J. Zhang, K. Dastafkan, K. Wang, C. Zhao and Z. Shi, *ACS Sustainable Chem. Eng.*, 2021, **9**, 2047-2056.

- S20 J.-G. Li, H. Sun, L. Lv, Z. Li, X. Ao, C. Xu, Y. Li and C. Wang, *ACS Appl. Mater. Interfaces*, 2019, **11**, 8106-8114.
- S21 Y. Tian, Z. Lin, J. Yu, S. Zhao, Q. Liu, J. Liu, R. Chen, Y. Qi, H. Zhang, R. Li, J. Li and J. Wang, *ACS Sustainable Chem. Eng.*, 2019, **7**, 14639-14646.
- S22 H. J. Song, H. Yoon, B. Ju, G.-H. Lee, D.-W. Kim, *Adv. Energy Mater.*, 2018, **8**, 1802319.
- S23 X. Wang, W. Ma, C. Ding, Z. Xu, H. Wang, X. Zong and C. Li, *ACS Catal.*, 2018, **8**, 9926-9935.
- S24 D. Liu, H. Xu, C. Wang, H. Shang, R. Yu, Y. Wang, J. Li, X. Li and Y. Du, *Inorg. Chem.*, 2021, **60**, 5882-5889.
- S25 J.-L. Liu, X.-Y. Zhou, L. Qin, Y.-Q. Wang, H.-J. Zhu, G. Ni, M.-L. Ma and M.-D. Zhang, *J. Mol. Struct.*, 2022, **1252**, 132184.
- S26 W. Fang, J. Wang, Y. Hu, X. Cui, R. Zhu, Y. Zhang, C. Yue, J. Dang, W. Cui, H. Zhao and Z. Li, *Electrochim. Acta*, 2021, **365**, 137384.
- S27 Q. Yuan, Y. Yu, Y. Gong and X. Bi, *ACS Appl. Mater. Interfaces*, 2020, **12**, 3592-3602.
- S28 Q. Zhang, R. F. Webster, S. Cheong, R. D. Tilley, X. Lu and R. Amal, *Part. Part. Syst. Charact.*, 2019, **36**, 1800252.
- S29 M. Li, X. Deng, K. Xiang, Y. Liang, B. Zhao, J. Hao, J.-L. Luo and X.-Z. Fu, *ChemSusChem*, 2020, **13**, 914-921.
- S30 B. Zhao, J. Liu, X. Wang, C. Xu, P. Sui, R. Feng, L. Wang, J. Zhang, J.-L. Luo and X.-Z. Fu, *NanoEnergy*, 2021, **80**, 10553.
- S31 S. Huang, Y. Meng, S. He, A. Goswami, Q. Wu, J. Li, S. Tong, T. Asefa and M. Wu, *Adv. Funct. Mater.*, 2017, **27**, 1606585.
- S32 J. T. Ren and Z. Y. Yuan, *ACS Sustainable Chem. Eng.*, 2017, **5**, 7203-7210.

- S33 J. Yu, G. Cheng and W. Luo, *J. Mater. Chem. A*, 2017, **5**, 15838-15844.
- S34 W. Liu, J. Bao, M. Guan, Y. Zhao, J. Lian, J. Qiu, L. Xu, Y. Huang, J. Qian and H. Li, *Dalton Trans.*, 2017, **46**, 8372-8376.
- S35 H. S. Lee, J. Pan, G. S. Gund and H. S. Park, *Adv. Mater. Interfaces*, 2020, **7**, 2000138.
- S36 X. Zhang, J. Luo, K. Wan, D. Plessers, B. Sels, J. Song, L. Chen, T. Zhang, P. Tang, J. R. Morante, J. Arbiol and J. Fransaer, *Adv. Funct. Mater.*, 2017, **27**, 1701008.
- S37 X. Xiao, D. Huang, Y. Fu, M. Wen, X. Jiang, X. Lv, M. Li, L. Gao, S. Liu, M. Wang, C. Zhao and Y. Shen, *ACS Appl. Mater. Interfaces*, 2018, **10**, 4689-4696.
- S38 H. J. Song, H. Yoon, B. Ju, G. H. Lee and D. W. Kim, *Adv. Energy Mater.*, 2018, **8**, 1802319.
